# Supplementary material
Source: publisher site journal article supplement (https://www.dovepress.com/article/557260)
Supplement: Supplementary file 1 [file 557260%20Revised%20Supplementary%20Materials.docx]

**Table S1** Sensitivity analyses using alternative cut-off values for low NKA (250 pg/mL and 100 pg/mL)

| NKA cut-off |  |  | Quartiles of CBC-derived inflammatory markers levels | | | | Overall *p* |
| --- | --- | --- | --- | --- | --- | --- | --- |
|  |  | Q1 | Q2 | Q3 | Q4 |
| 250 pg/mL | NLR | Unadjusted | 1 (Ref.) | 1.73 (1.48–2.03) | 2.42 (2.07–2.82) | 4.71 (4.07–5.46) | <0.001 |
|  | Adjusted | 1 (Ref.) | 1.74 (1.48–2.04) | 2.43 (2.08–2.83) | 4.75 (4.10–5.50) | <0.001 |
| PLR | Unadjusted | 1 (Ref.) | 1.33 (1.15–1.54) | 1.60 (1.38–1.84) | 2.85 (2.49–3.27) | <0.001 |
|  | Adjusted | 1 (Ref.) | 1.38 (1.19–1.60) | 1.70 (1.47–1.97) | 3.13 (2.71–3.60) | <0.001 |
| MLR | Unadjusted | 1 (Ref.) | 1.14 (0.99–1.31) | 1.27 (1.11–1.46) | 1.65 (1.45–1.89) | <0.001 |
|  | Adjusted | 1 (Ref.) | 1.17 (1.02–1.34) | 1.32 (1.15–1.52) | 1.73 (1.51–1.98) | <0.001 |
| SIRI | Unadjusted | 1 (Ref.) | 1.38 (1.18–1.60) | 1.82 (1.58–2.11) | 3.36 (2.93–3.86) | <0.001 |
|  | Adjusted | 1 (Ref.) | 1.42 (1.22–1.66) | 1.94 (1.67–2.25) | 3.64 (3.16–4.20) | <0.001 |
| SII | Unadjusted | 1 (Ref.) | 1.69 (1.43–1.99) | 2.78 (2.38–3.25) | 5.64 (4.85–6.55) | <0.001 |
|  | Adjusted | 1 (Ref.) | 1.73 (1.46–2.04) | 2.86 (2.44–3.35) | 5.90 (5.06–6.87) | <0.001 |
| 100 pg/mL | NLR | Unadjusted | 1 (Ref.) | 1.94 (1.49–2.54) | 3.09 (2.40–3.97) | 7.52 (5.94–9.51) | <0.001 |
|  | Adjusted | 1 (Ref.) | 1.96 (1.50–2.57) | 3.09 (2.40–3.98) | 7.53 (5.95–9.54) | <0.001 |
| PLR | Unadjusted | 1 (Ref.) | 1.44 (1.15–1.80) | 1.89 (1.52–2.34) | 3.85 (3.15–4.70) | <0.001 |
|  | Adjusted | 1 (Ref.) | 1.46 (1.16–1.84) | 1.95 (1.56–2.43) | 4.01 (3.26–4.93) | <0.001 |
| MLR | Unadjusted | 1 (Ref.) | 1.26 (1.03–1.54) | 1.31 (1.07–1.60) | 2.10 (1.74–2.52) | <0.001 |
|  | Adjusted | 1 (Ref.) | 1.33 (1.08–1.62) | 1.42 (1.16–1.73) | 2.32 (1.92–2.80) | <0.001 |
| SIRI | Unadjusted | 1 (Ref.) | 1.29 (1.02–1.64) | 2.03 (1.63–2.53) | 4.48 (3.66–5.49) | <0.001 |
|  | Adjusted | 1 (Ref.) | 1.37 (1.08–1.74) | 2.26 (1.80–2.82) | 5.18 (4.20–6.38) | <0.001 |
| SII | Unadjusted | 1 (Ref.) | 1.81 (1.37–2.39) | 3.11 (2.40–4.02) | 8.69 (6.84–11.05) | <0.001 |
|  | Adjusted | 1 (Ref.) | 1.86 (1.41–2.46) | 3.17 (2.45–4.11) | 8.93 (7.01–11.38) | <0.001 |

Adjusted for age, sex, BMI, smoking status, drinking status, regular exercise, hypertension, and diabetes mellitus.

Abbreviations: MLR, monocyte-to-lymphocyte ratio; NLR, neutrophil-to-lymphocyte ratio; PLR, platelet-to-lymphocyte ratio; SII, systemic immune-inflammation index; SIRI, systemic inflammation response index

**Table S2** Pairwise comparison of AUROCs among CBC-derived inflammatory markers for low NKA

| Comparison | AUROC difference (∆) | *p*-value |
| --- | --- | --- |
| SII vs NLR | 0.022 | <0.0001 |
| SII vs SIRI | 0.051 | <0.0001 |
| SII vs PLR | 0.072 | <0.0001 |
| SII vs MLR | 0.123 | <0.0001 |
| NLR vs SIRI | 0.029 | <0.0001 |
| NLR vs PLR | 0.050 | <0.0001 |
| NLR vs MLR | 0.101 | <0.0001 |
| SIRI vs PLR | 0.021 | 0.0050 |
| SIRI vs MLR | 0.072 | <0.0001 |
| PLR vs MLR | 0.051 | <0.0001 |

**p*-values were obtained using the DeLong test for correlated ROC curves.

Abbreviations: MLR, monocyte-to-lymphocyte ratio; NLR, neutrophil-to-lymphocyte ratio; PLR, platelet-to-lymphocyte ratio; SII, systemic immune-inflammation index; SIRI, systemic inflammation response index
